# Supplementary material for: LC–MS Lipidomics: Exploiting a Simple High-Throughput Method for the Comprehensive Extraction of Lipids in a Ruminant Fat Dose-Response Study
Source: PubMed Central journal article supplement (PMC7407148; doi:10.3390/metabo10070296), 2020-07-17
Supplement: metabolites-10-00296-s001.pdf [file metabolites-10-00296-s001.pdf]

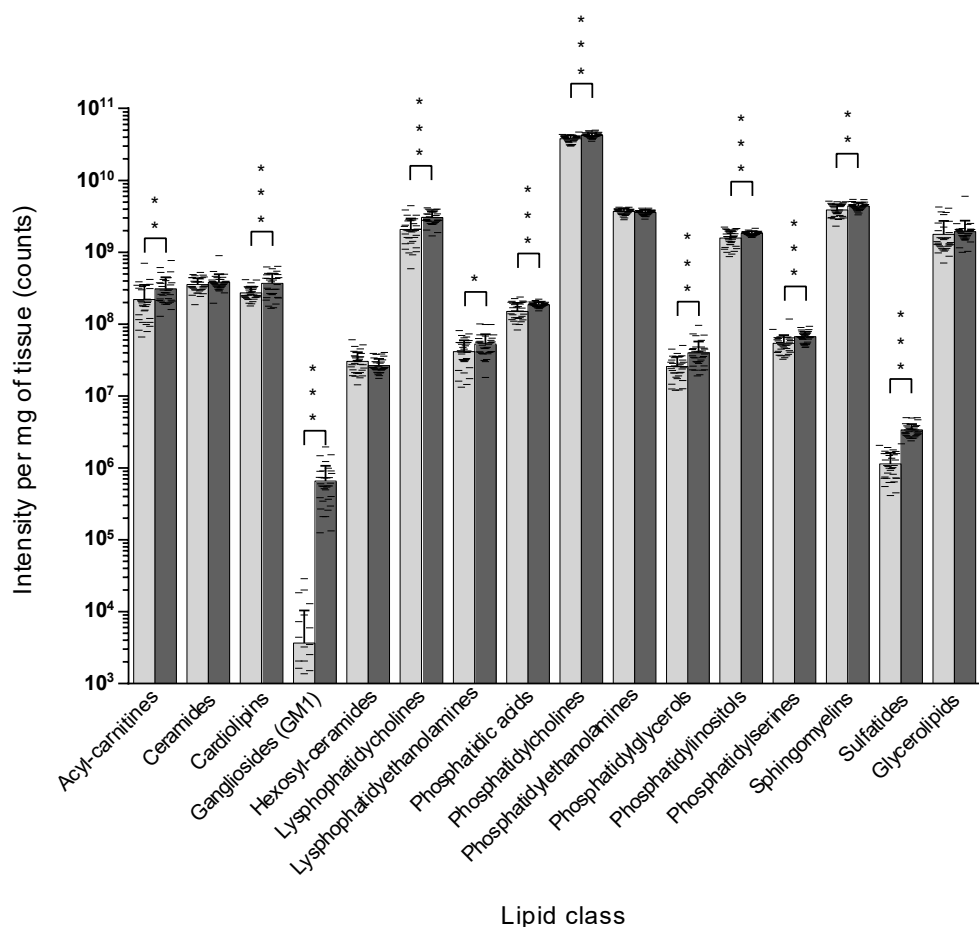

1  
2  
3  
4  
5  
6  
7  
8  
9  
10  
11

**Figure S1.** This figure shows the comparison between the two lipid extraction techniques regarding their extraction efficiency on each lipid class detected in the rat liver samples by each sample extraction method (Folch liquid-liquid extraction with a compositions of chloroform: methanol: water, ~7: 3: 4 , and Protein precipitation liquid extraction with a composition of chloroform: methanol: acetone, ~7: 3: 4 ). n = 34 rat liver samples per extraction method. The intensity of the lipids were measured by liquid chromatography with mass spectrometry and were not normalised to any internal standard. The significance of the difference between the two extraction protocols are shown by the p-value star system; where  $p \leq 0.05$  was considered statistically significant ( $p < 0.05 = *$ ,  $p < 0.01 = **$ ,  $p < 0.001 = ***$ ). Error bars represent  $\pm$  standard deviation.

12 **Table S1.** This table shows the comparison between the two lipid extraction techniques regarding  
 13 their extraction efficiency on the total intensity of each lipid class detected in the rat liver samples by  
 14 each sample extraction method (Folch-LLE: Folch liquid-liquid extraction with a compositions of  
 15 chloroform: methanol: water, ~7: 3: 4, and PPLE: protein precipitation liquid extraction with a  
 16 composition of chloroform: methanol: acetone, ~7: 3: 4). n = 34 rat liver samples per extraction method.  
 17 The percentage increase the PPLE method is over the Folch-LLE method is shown (% diff.) along with  
 18 the p value resulting from a t-test (p<0.05 designates statistical significance are in bold & shaded). The  
 19 total number of lipid species detected and pass the quality control process are also shown.

|                                      | Folch-LLE<br>total lipid<br>intensity | PPLE<br>total lipid<br>intensity | % diff.        | P value         |
|--------------------------------------|---------------------------------------|----------------------------------|----------------|-----------------|
| <b>Acyl-carnitines</b>               | <b>2.20E+08</b>                       | <b>3.11E+08</b>                  | <b>41%</b>     | <b>0.00689</b>  |
| Ceramides                            | 3.92E+08                              | 4.25E+08                         | 8%             | 0.209           |
| <b>Cardiolipins</b>                  | <b>2.72E+08</b>                       | <b>3.68E+08</b>                  | <b>35%</b>     | <b>0.000347</b> |
| <b>Gangliosides (GM1)</b>            | <b>3.67E+03</b>                       | <b>6.59E+05</b>                  | <b>18,000%</b> | <b>1.61E-13</b> |
| Hesosyl-ceramides                    | 3.03E+07                              | 2.66E+07                         | -12%           | 0.0824          |
| <b>Lysophosphatidylcholines</b>      | <b>2.07E+09</b>                       | <b>3.04E+09</b>                  | <b>47%</b>     | <b>1.57E-06</b> |
| <b>Lysophosphatidylethanolamines</b> | <b>4.16E+07</b>                       | <b>5.32E+07</b>                  | <b>28%</b>     | <b>0.0117</b>   |
| <b>Phosphatidic acids</b>            | <b>1.50E+08</b>                       | <b>1.86E+08</b>                  | <b>24%</b>     | <b>8.26E-05</b> |
| <b>Phosphatidylcholines</b>          | <b>3.80E+10</b>                       | <b>4.23E+10</b>                  | <b>11%</b>     | <b>1.78E-05</b> |
| Phosphatidylethanolamines            | 3.68E+09                              | 3.59E+09                         | -3%            | 0.235           |
| <b>Phosphatidylglycerols</b>         | <b>2.58E+07</b>                       | <b>3.99E+07</b>                  | <b>55%</b>     | <b>7.05E-05</b> |
| <b>Phosphatidylinositols</b>         | <b>1.58E+09</b>                       | <b>1.83E+09</b>                  | <b>16%</b>     | <b>0.000833</b> |
| <b>Phosphatidylserines</b>           | <b>5.40E+07</b>                       | <b>6.71E+07</b>                  | <b>24%</b>     | <b>0.000315</b> |
| <b>Sphingomyelins</b>                | <b>3.87E+09</b>                       | <b>4.39E+09</b>                  | <b>13%</b>     | <b>0.00157</b>  |
| <b>Sulfatides</b>                    | <b>1.14E+06</b>                       | <b>3.38E+06</b>                  | <b>197%</b>    | <b>2.71E-23</b> |
| Glycerolipids                        | 1.77E+09                              | 1.94E+09                         | 9%             | 0.441           |
| Total No. of lipid species           | 455                                   | 472                              |                |                 |

**Table S2.** This table shows the lipids quantified in this LC-MS method, along with the ionisation mode (either positive; +ve, or negative; -ve), the detected ion (m/z), the expected retention time (minutes) and the internal standard used for normalisation and quantification.. Lipid are shown in their shorthand notations with the number of carbons and unsaturated bonds in the fatty acid moiety separated by a colon; acyl-carnitines (Carn), ceramides (Cer), cardiolipins (CL), diacylglycerols (DG), gangliosides (GM1), hexosylceramides (Hex-Cer), lyso-phosphatidylcholines (LPC), lyso-phosphatidylethanolamines (LPE), lyso-phosphatidylinositols (LPI), lyso-cardiolipins (Lyso\_CL), phosphatidic acids (PA), phosphatidylcholines (PC), phosphatidylethanolamines (PE), phosphatidylglycerol (PG), phosphatidylinositols (PI), phosphatidylserines (PS), sulfatides (S), sphingomyelins (SM), triacylglycerides (TG).

|                   | <b>Ion mode (+ve/-ve)</b> | <b>Ions</b> | <b>Retention time (mins)</b> | <b>Internal standard used</b> |
|-------------------|---------------------------|-------------|------------------------------|-------------------------------|
| Carn_(00:0)       | +ve                       | 162.1125    | 0.30                         | IS_Car_4:0-d7                 |
| Carn_(02:0)       | +ve                       | 204.1230    | 0.30                         | IS_Car_4:0-d7                 |
| Carn_(03:0)       | +ve                       | 218.1387    | 0.30                         | IS_Car_4:0-d7                 |
| Carn_(03:0-2COOH) | +ve                       | 248.1129    | 0.30                         | IS_Car_4:0-d7                 |
| Carn_(03:1)       | +ve                       | 216.1230    | 0.28                         | IS_Car_4:0-d7                 |
| Carn_(03:0-OH)    | +ve                       | 234.1336    | 0.30                         | IS_Car_4:0-d7                 |
| Carn_(04:0)       | +ve                       | 232.1543    | 0.30                         | IS_Car_4:0-d7                 |
| Carn_(04:0-2COOH) | +ve                       | 262.1285    | 0.28                         | IS_Car_4:0-d7                 |
| Carn_(04:1)       | +ve                       | 230.1387    | 0.30                         | IS_Car_4:0-d7                 |
| Carn_(04:0-OH)    | +ve                       | 248.1493    | 0.30                         | IS_Car_4:0-d7                 |
| Carn_(05:0)       | +ve                       | 246.1700    | 0.30                         | IS_Car_4:0-d7                 |
| Carn_(05:1)       | +ve                       | 244.1543    | 0.30                         | IS_Car_4:0-d7                 |
| Carn_(06:0)       | +ve                       | 260.1856    | 0.30                         | IS_Car_4:0-d7                 |
| Carn_(06:0-2COOH) | +ve                       | 290.1598    | 0.30                         | IS_Car_4:0-d7                 |
| Carn_(06:1)       | +ve                       | 258.1700    | 0.30                         | IS_Car_4:0-d7                 |
| Carn_(07:0)       | +ve                       | 274.2013    | 0.30                         | IS_Car_4:0-d7                 |
| Carn_(08:0)       | +ve                       | 288.2169    | 0.30                         | IS_Car_4:0-d7                 |
| Carn_(08:0-2COOH) | +ve                       | 317.1838    | 0.30                         | IS_Car_4:0-d7                 |
| Carn_(08:1)       | +ve                       | 286.2013    | 0.30                         | IS_Car_4:0-d7                 |
| Carn_(09:0)       | +ve                       | 302.2326    | 0.30                         | IS_Car_16:0-d3                |
| Carn_(10:0)       | +ve                       | 316.2482    | 0.30                         | IS_Car_16:0-d3                |
| Carn_(10:0-2COOH) | +ve                       | 346.2224    | 0.30                         | IS_Car_16:0-d3                |
| Carn_(10:1)       | +ve                       | 314.2326    | 0.30                         | IS_Car_16:0-d3                |
| Carn_(10:2)       | +ve                       | 298.2377    | 0.30                         | IS_Car_16:0-d3                |
| Carn_(10:0-OH)    | +ve                       | 332.2432    | 0.30                         | IS_Car_16:0-d3                |
| Carn_(11:0)       | +ve                       | 330.2639    | 0.30                         | IS_Car_16:0-d3                |
| Carn_(12:0)       | +ve                       | 344.2795    | 0.40                         | IS_Car_16:0-d3                |
| Carn_(12:1)       | +ve                       | 342.2639    | 0.30                         | IS_Car_16:0-d3                |
| Carn_(12:0-OH)    | +ve                       | 360.2745    | 0.30                         | IS_Car_16:0-d3                |
| Carn_(13:0)       | +ve                       | 358.2952    | 0.40                         | IS_Car_16:0-d3                |
| Carn_(14:0)       | +ve                       | 372.3108    | 0.46                         | IS_Car_16:0-d3                |
| Carn_(14:1)       | +ve                       | 370.2952    | 0.40                         | IS_Car_16:0-d3                |
| Carn_(14:2)       | +ve                       | 354.3003    | 0.30                         | IS_Car_16:0-d3                |
| Carn_(14:0-OH)    | +ve                       | 388.3058    | 0.40                         | IS_Car_16:0-d3                |
| Carn_(15:0)       | +ve                       | 386.3265    | 0.46                         | IS_Car_16:0-d3                |
| Carn_(16:0)       | +ve                       | 400.3421    | 0.49                         | IS_Car_16:0-d3                |
| Carn_(16:1)       | +ve                       | 389.3265    | 0.40                         | IS_Car_16:0-d3                |
| Carn_(16:2)       | +ve                       | 396.3108    | 0.40                         | IS_Car_16:0-d3                |
| Carn_(16:0-OH)    | +ve                       | 416.3371    | 0.46                         | IS_Car_16:0-d3                |
| Carn_(17:0)       | +ve                       | 414.3578    | 0.54                         | IS_Car_16:0-d3                |
| Carn_(18:0)       | +ve                       | 428.3734    | 0.62                         | IS_Car_16:0-d3                |
| Carn_(18:1)       | +ve                       | 426.3578    | 0.51                         | IS_Car_16:0-d3                |
| Carn_(18:2)       | +ve                       | 424.3421    | 0.46                         | IS_Car_16:0-d3                |
| Carn_(18:3)       | +ve                       | 422.3265    | 0.46                         | IS_Car_16:0-d3                |

|                |     |                    |      |                 |
|----------------|-----|--------------------|------|-----------------|
| Carn_(18:0-OH) | +ve | 444.3684           | 0.50 | IS_Car_16:0-d3  |
| Carn_(19:0)    | +ve | 442.3891           | 0.65 | IS_Car_16:0-d3  |
| Carn_(20:0)    | +ve | 456.4047           | 0.87 | IS_Car_16:0-d3  |
| Carn_(22:5)    | +ve | 474.3578           | 0.46 | IS_Car_16:0-d3  |
| Cer_(32:0)     | +ve | 494.4931, 512.5037 | 3.53 | IS_Cer_16:0-d31 |
| Cer_(32:0-OH)  | +ve | 528.4986           | 3.21 | IS_Cer_16:0-d31 |
| Cer_(32:1)     | +ve | 492.4775, 510.4881 | 3.25 | IS_Cer_16:0-d31 |
| Cer_(32:1-OH)  | +ve | 526.4830           | 2.91 | IS_Cer_16:0-d31 |
| Cer_(33:0)     | +ve | 508.5088, 526.5194 | 3.87 | IS_Cer_16:0-d31 |
| Cer_(33:0-OH)  | +ve | 542.5143           | 3.61 | IS_Cer_16:0-d31 |
| Cer_(33:1)     | +ve | 506.4931, 524.5037 | 3.65 | IS_Cer_16:0-d31 |
| Cer_(33:1-OH)  | +ve | 540.5986           | 3.30 | IS_Cer_16:0-d31 |
| Cer_(34:0)     | +ve | 522.5244, 540.5350 | 4.13 | IS_Cer_16:0-d31 |
| Cer_(34:0-OH)  | +ve | 556.5299           | 3.93 | IS_Cer_16:0-d31 |
| Cer_(34:1)     | +ve | 520.5088, 538.5194 | 3.89 | IS_Cer_16:0-d31 |
| Cer_(34:1-OH)  | +ve | 554.5143           | 3.71 | IS_Cer_16:0-d31 |
| Cer_(35:0)     | +ve | 536.5401, 554.5507 | 4.33 | IS_Cer_16:0-d31 |
| Cer_(35:0-OH)  | +ve | 570.5456           | 4.15 | IS_Cer_16:0-d31 |
| Cer_(35:1)     | +ve | 534.5244, 552.5350 | 4.19 | IS_Cer_16:0-d31 |
| Cer_(35:1-OH)  | +ve | 568.5299           | 3.99 | IS_Cer_16:0-d31 |
| Cer_(36:0)     | +ve | 550.5557, 568.5663 | 4.49 | IS_Cer_16:0-d31 |
| Cer_(36:0-OH)  | +ve | 584.5612           | 4.36 | IS_Cer_16:0-d31 |
| Cer_(36:1)     | +ve | 548.5401, 566.5507 | 4.37 | IS_Cer_16:0-d31 |
| Cer_(36:1-OH)  | +ve | 582.5456           | 4.21 | IS_Cer_16:0-d31 |
| Cer_(36:2)     | +ve | 546.5244, 564.5350 | 4.05 | IS_Cer_16:0-d31 |
| Cer_(36:2-OH)  | +ve | 580.5299           | 3.83 | IS_Cer_16:0-d31 |
| Cer_(37:0)     | +ve | 564.5714, 582.5820 | 4.65 | IS_Cer_16:0-d31 |
| Cer_(37:0-OH)  | +ve | 598.5769           | 4.52 | IS_Cer_16:0-d31 |
| Cer_(37:1)     | +ve | 562.5557, 580.5663 | 4.55 | IS_Cer_16:0-d31 |
| Cer_(37:1-OH)  | +ve | 596.5612           | 4.38 | IS_Cer_16:0-d31 |
| Cer_(37:2)     | +ve | 560.5401, 578.5507 | 4.25 | IS_Cer_16:0-d31 |
| Cer_(38:0)     | +ve | 578.5870, 596.5976 | 4.79 | IS_Cer_16:0-d31 |
| Cer_(38:0-OH)  | +ve | 612.5925           | 4.66 | IS_Cer_16:0-d31 |
| Cer_(38:1)     | +ve | 576.5714, 594.5820 | 4.69 | IS_Cer_16:0-d31 |
| Cer_(38:1-OH)  | +ve | 610.5769           | 4.54 | IS_Cer_16:0-d31 |
| Cer_(38:2)     | +ve | 574.5557, 592.5663 | 4.39 | IS_Cer_16:0-d31 |
| Cer_(39:0)     | +ve | 592.6027, 610.6133 | 4.90 | IS_Cer_16:0-d31 |
| Cer_(39:0-OH)  | +ve | 626.6082           | 4.80 | IS_Cer_16:0-d31 |
| Cer_(39:1)     | +ve | 590.5870, 608.5976 | 4.83 | IS_Cer_16:0-d31 |
| Cer_(39:1-OH)  | +ve | 624.5925           | 4.70 | IS_Cer_16:0-d31 |
| Cer_(39:2)     | +ve | 588.5714, 606.5820 | 4.55 | IS_Cer_16:0-d31 |
| Cer_(40:0)     | +ve | 606.6183, 624.6289 | 5.04 | IS_Cer_16:0-d31 |
| Cer_(40:0-OH)  | +ve | 640.6238           | 4.94 | IS_Cer_16:0-d31 |
| Cer_(40:1)     | +ve | 604.6027, 622.6133 | 4.96 | IS_Cer_16:0-d31 |
| Cer_(40:1-OH)  | +ve | 638.6082           | 4.83 | IS_Cer_16:0-d31 |
| Cer_(40:2)     | +ve | 602.5870, 620.5976 | 4.69 | IS_Cer_16:0-d31 |
| Cer_(41:0)     | +ve | 620.6340, 638.6446 | 5.17 | IS_Cer_16:0-d31 |
| Cer_(41:0-OH)  | +ve | 654.6395           | 5.06 | IS_Cer_16:0-d31 |
| Cer_(41:1)     | +ve | 618.6183, 636.6289 | 5.08 | IS_Cer_16:0-d31 |
| Cer_(41:1-OH)  | +ve | 652.6238           | 4.96 | IS_Cer_16:0-d31 |
| Cer_(41:2)     | +ve | 616.6027, 634.6133 | 4.83 | IS_Cer_16:0-d31 |
| Cer_(42:0)     | +ve | 634.6496, 652.6602 | 5.29 | IS_Cer_16:0-d31 |
| Cer_(42:0-OH)  | +ve | 668.6551           | 5.19 | IS_Cer_16:0-d31 |
| Cer_(42:1)     | +ve | 632.6340, 650.6446 | 5.19 | IS_Cer_16:0-d31 |
| Cer_(42:1-OH)  | +ve | 666.6395           | 4.92 | IS_Cer_16:0-d31 |
| Cer_(42:2)     | +ve | 630.6183, 648.6289 | 4.94 | IS_Cer_16:0-d31 |
| Cer_(42:3)     | +ve | 628.6027, 646.6133 | 4.87 | IS_Cer_16:0-d31 |
| Cer_(43:0)     | +ve | 648.6653, 666.6759 | 5.41 | IS_Cer_16:0-d31 |

|               |     |                    |      |                 |
|---------------|-----|--------------------|------|-----------------|
| Cer_(43:0-OH) | +ve | 682.6708           | 5.31 | IS_Cer_16:0-d31 |
| Cer_(43:1)    | +ve | 646.6496, 664.6602 | 5.31 | IS_Cer_16:0-d31 |
| Cer_(43:1-OH) | +ve | 680.6551           | 5.21 | IS_Cer_16:0-d31 |
| Cer_(43:2)    | +ve | 644.6340, 662.6446 | 5.08 | IS_Cer_16:0-d31 |
| Cer_(44:0)    | +ve | 662.6809, 680.6915 | 5.53 | IS_Cer_16:0-d31 |
| Cer_(44:0-OH) | +ve | 696.6864           | 5.43 | IS_Cer_16:0-d31 |
| Cer_(44:1)    | +ve | 660.6653, 678.6759 | 5.41 | IS_Cer_16:0-d31 |
| Cer_(44:1-OH) | +ve | 694.6708           | 5.17 | IS_Cer_16:0-d31 |
| Cer_(44:2)    | +ve | 658.6496, 676.6602 | 5.19 | IS_Cer_16:0-d31 |
| Cer_(45:0)    | +ve | 676.6966, 694.7072 | 5.65 | IS_Cer_16:0-d31 |
| Cer_(45:0-OH) | +ve | 710.7021           | 5.53 | IS_Cer_16:0-d31 |
| Cer_(45:1)    | +ve | 674.6809, 692.6915 | 5.39 | IS_Cer_16:0-d31 |
| Cer_(45:1-OH) | +ve | 708.6864           | 5.43 | IS_Cer_16:0-d31 |
| Cer_(45:2)    | +ve | 690.6759, 672.6653 | 5.31 | IS_Cer_16:0-d31 |
| Cer_(46:0)    | +ve | 690.7122, 708.7228 | 5.75 | IS_Cer_16:0-d31 |
| Cer_(46:0-OH) | +ve | 724.7177           | 5.63 | IS_Cer_16:0-d31 |
| Cer_(46:1)    | +ve | 688.6966, 706.7072 | 5.50 | IS_Cer_16:0-d31 |
| Cer_(46:1-OH) | +ve | 722.7021           | 5.43 | IS_Cer_16:0-d31 |
| Cer_(46:2)    | +ve | 686.6809, 704.6915 | 5.41 | IS_Cer_16:0-d31 |
| Cer_(47:0)    | +ve | 704.7279, 722.7385 | 5.88 | IS_Cer_16:0-d31 |
| Cer_(47:0-OH) | +ve | 738.7334           | 5.65 | IS_Cer_16:0-d31 |
| Cer_(47:1)    | +ve | 702.7122, 720.7228 | 5.76 | IS_Cer_16:0-d31 |
| Cer_(48:0)    | +ve | 718.7435, 736.7541 | 5.96 | IS_Cer_16:0-d31 |
| Cer_(48:0-OH) | +ve | 752.7490           | 5.76 | IS_Cer_16:0-d31 |
| Cer_(48:1)    | +ve | 716.7279, 734.7385 | 5.75 | IS_Cer_16:0-d31 |
| Cer_(48:1-OH) | +ve | 750.7334           | 5.61 | IS_Cer_16:0-d31 |
| Cer_(48:2)    | +ve | 714.7122, 732.7228 | 5.53 | IS_Cer_16:0-d31 |
| Cer_(50:0)    | +ve | 746.7748, 764.7854 | 6.08 | IS_Cer_16:0-d31 |
| Cer_(50:0-OH) | +ve | 780.7803           | 5.91 | IS_Cer_16:0-d31 |
| Cer_(50:1)    | +ve | 744.7592, 762.7698 | 5.90 | IS_Cer_16:0-d31 |
| Cer_(50:2)    | +ve | 742.7435, 760.7541 | 5.80 | IS_Cer_16:0-d31 |
| CL_(66:02)    | -ve | 1375.9650          | 5.64 | IS_TG_45:0-d87  |
| CL_(66:03)    | -ve | 1373.9493          | 5.50 | IS_TG_45:0-d87  |
| CL_(66:04)    | -ve | 1371.9337          | 5.36 | IS_TG_45:0-d87  |
| CL_(66:05)    | -ve | 1396.9180          | 5.25 | IS_TG_45:0-d87  |
| CL_(66:06)    | -ve | 1367.9024          | 5.06 | IS_TG_45:0-d87  |
| CL_(66:07)    | -ve | 1365.8867          | 4.99 | IS_TG_45:0-d87  |
| CL_(67:02)    | -ve | 1389.9806          | 5.72 | IS_TG_45:0-d87  |
| CL_(67:03)    | -ve | 1387.9650          | 5.58 | IS_TG_45:0-d87  |
| CL_(67:05)    | -ve | 1383.9337          | 5.25 | IS_TG_45:0-d87  |
| CL_(68:00)    | -ve | 1408.0276          | 5.98 | IS_TG_45:0-d87  |
| CL_(68:01)    | -ve | 1406.0119          | 5.80 | IS_TG_45:0-d87  |
| CL_(68:02)    | -ve | 1403.9963          | 5.80 | IS_TG_45:0-d87  |
| CL_(68:03)    | -ve | 1401.9806          | 5.66 | IS_TG_45:0-d87  |
| CL_(68:04)    | -ve | 1399.9650          | 5.50 | IS_TG_45:0-d87  |
| CL_(69:04)    | -ve | 1413.9806          | 5.60 | IS_TG_45:0-d87  |
| CL_(69:05)    | -ve | 1411.9650          | 5.44 | IS_TG_45:0-d87  |
| CL_(69:06)    | -ve | 1409.9493          | 5.31 | IS_TG_45:0-d87  |
| CL_(69:07)    | -ve | 1407.9337          | 5.16 | IS_TG_45:0-d87  |
| CL_(70:00)    | -ve | 1436.0589          | 6.07 | IS_TG_45:0-d87  |
| CL_(70:01)    | -ve | 1434.0432          | 5.98 | IS_TG_45:0-d87  |
| CL_(70:02)    | -ve | 1432.0276          | 5.84 | IS_TG_45:0-d87  |
| CL_(70:03)    | -ve | 1430.0119          | 5.82 | IS_TG_45:0-d87  |
| CL_(70:04)    | -ve | 1427.9963          | 5.68 | IS_TG_45:0-d87  |
| CL_(70:05)    | -ve | 1425.9806          | 5.52 | IS_TG_45:0-d87  |
| CL_(70:06)    | -ve | 1423.9650          | 5.38 | IS_TG_45:0-d87  |
| CL_(70:07)    | -ve | 1421.9493          | 5.22 | IS_TG_45:0-d87  |
| CL_(70:08)    | -ve | 1419.9337          | 5.12 | IS_TG_45:0-d87  |

|               |     |                              |      |                |
|---------------|-----|------------------------------|------|----------------|
| CL_(70:09)    | -ve | 1417.9180                    | 5.20 | IS_TG_45:0-d87 |
| CL_(71:02)    | -ve | 1446.0432                    | 5.90 | IS_TG_45:0-d87 |
| CL_(71:03)    | -ve | 1444.0276                    | 5.72 | IS_TG_45:0-d87 |
| CL_(71:04)    | -ve | 1442.0119                    | 5.72 | IS_TG_45:0-d87 |
| CL_(71:05)    | -ve | 1439.9963                    | 5.46 | IS_TG_45:0-d87 |
| CL_(71:06)    | -ve | 1437.9806                    | 5.46 | IS_TG_45:0-d87 |
| CL_(71:07)    | -ve | 1435.9650                    | 5.32 | IS_TG_45:0-d87 |
| CL_(71:08)    | -ve | 1433.9493                    | 5.18 | IS_TG_45:0-d87 |
| CL_(72:00)    | -ve | 1464.0902                    | 6.14 | IS_TG_45:0-d87 |
| CL_(72:01)    | -ve | 1462.0745                    | 6.05 | IS_TG_45:0-d87 |
| CL_(72:02)    | -ve | 1460.0589                    | 6.00 | IS_TG_45:0-d87 |
| CL_(72:03)    | -ve | 1458.0432                    | 5.84 | IS_TG_45:0-d87 |
| CL_(72:04)    | -ve | 1456.0276                    | 5.70 | IS_TG_45:0-d87 |
| CL_(72:05)    | -ve | 1454.0119                    | 5.64 | IS_TG_45:0-d87 |
| CL_(72:06)    | -ve | 1451.9963                    | 5.54 | IS_TG_45:0-d87 |
| CL_(72:07)    | -ve | 1449.9806                    | 5.40 | IS_TG_45:0-d87 |
| CL_(72:08)    | -ve | 1447.9650                    | 5.27 | IS_TG_45:0-d87 |
| CL_(72:09)    | -ve | 1445.9493                    | 5.22 | IS_TG_45:0-d87 |
| CL_(72:10)    | -ve | 1443.9337                    | 5.16 | IS_TG_45:0-d87 |
| CL_(74:06)    | -ve | 1480.0276                    | 5.70 | IS_TG_45:0-d87 |
| CL_(74:07)    | -ve | 1478.0119                    | 5.56 | IS_TG_45:0-d87 |
| CL_(74:08)    | -ve | 1475.9963                    | 5.44 | IS_TG_45:0-d87 |
| CL_(74:09)    | -ve | 1473.9806                    | 5.32 | IS_TG_45:0-d87 |
| CL_(74:10)    | -ve | 1471.9650                    | 5.42 | IS_TG_45:0-d87 |
| CL_(74:11)    | -ve | 1469.9493                    | 5.31 | IS_TG_45:0-d87 |
| CL_(76:09)    | -ve | 1502.0119                    | 5.60 | IS_TG_45:0-d87 |
| CL_(76:10)    | -ve | 1499.9963                    | 5.56 | IS_TG_45:0-d87 |
| CL_(76:11)    | -ve | 1497.9806                    | 5.46 | IS_TG_45:0-d87 |
| CL_(76:12)    | -ve | 1495.9650                    | 5.34 | IS_TG_45:0-d87 |
| DG_(32:0)     | +ve | 551.5034, 591.4959, 607.4698 | 4.63 | IS_TG_45:0-d87 |
| DG_(34:0)     | +ve | 579.5347, 619.5272, 635.5011 | 4.89 | IS_TG_45:0-d87 |
| DG_(34:1)     | +ve | 577.5190, 617.5115, 633.4855 | 4.65 | IS_TG_45:0-d87 |
| DG_(36:0)     | +ve | 647.5585, 663.5324, 607.5660 | 5.14 | IS_TG_45:0-d87 |
| DG_(36:1)     | +ve | 605.5503, 645.5428, 661.5168 | 4.92 | IS_TG_45:0-d87 |
| DG_(36:2)     | +ve | 603.5347, 643.5272, 659.5011 | 4.68 | IS_TG_45:0-d87 |
| GM1_(32:0)    | -ve | 1490.8224                    | 1.23 | IS_PG_34:1-d31 |
| GM1_(32:1)    | -ve | 1488.8068                    | 1.15 | IS_PG_34:1-d31 |
| GM1_(34:0)    | -ve | 1518.8538                    | 1.95 | IS_PG_34:1-d31 |
| GM1_(34:1)    | -ve | 1516.8381                    | 1.89 | IS_PG_34:1-d31 |
| GM1_(34:1-OH) | -ve | 1532.8330                    | 1.90 | IS_PG_34:1-d31 |
| GM1_(35:0)    | -ve | 1532.8694                    | 2.28 | IS_PG_34:1-d31 |
| GM1_(35:1)    | -ve | 1530.8538                    | 2.22 | IS_PG_34:1-d31 |
| GM1_(36:0)    | -ve | 1546.8850                    | 2.62 | IS_PG_34:1-d31 |
| GM1_(36:1)    | -ve | 1544.8694                    | 2.57 | IS_PG_34:1-d31 |
| GM1_(36:1-OH) | -ve | 1560.8643                    | 2.42 | IS_PG_34:1-d31 |
| GM1_(36:2)    | -ve | 1542.8537                    | 2.07 | IS_PG_34:1-d31 |
| GM1_(37:0)    | -ve | 1560.9007                    | 2.94 | IS_PG_34:1-d31 |
| GM1_(37:1)    | -ve | 1558.8850                    | 2.89 | IS_PG_34:1-d31 |
| GM1_(37:2)    | -ve | 1556.8694                    | 2.38 | IS_PG_34:1-d31 |
| GM1_(38:0)    | -ve | 1574.9163                    | 3.30 | IS_PG_34:1-d31 |
| GM1_(38:1)    | -ve | 1572.9007                    | 3.24 | IS_PG_34:1-d31 |
| GM1_(38:1-OH) | -ve | 1588.8956                    | 3.13 | IS_PG_34:1-d31 |
| GM1_(38:2)    | -ve | 1570.8850                    | 2.70 | IS_PG_34:1-d31 |
| GM1_(39:0)    | -ve | 1588.9320                    | 3.69 | IS_PG_34:1-d31 |
| GM1_(39:1)    | -ve | 1586.9163                    | 3.61 | IS_PG_34:1-d31 |
| GM1_(39:1-OH) | -ve | 1602.9112                    | 3.52 | IS_PG_34:1-d31 |
| GM1_(40:0)    | -ve | 1602.9476                    | 3.93 | IS_PG_34:1-d31 |
| GM1_(40:1)    | -ve | 1600.9320                    | 3.84 | IS_PG_34:1-d31 |

|                   |     |                    |      |                 |
|-------------------|-----|--------------------|------|-----------------|
| GM1_(40:1-OH)     | -ve | 1616.9269          | 3.72 | IS_PG_34:1-d31  |
| Hex-Cer_(32:0)    | +ve | 656.5460, 674.5565 | 2.85 | IS_Cer_16:0-d31 |
| Hex-Cer_(32:1)    | +ve | 654.5303, 672.5409 | 2.59 | IS_Cer_16:0-d31 |
| Hex-Cer_(34:0)    | +ve | 684.5773, 702.5878 | 3.61 | IS_Cer_16:0-d31 |
| Hex-Cer_(34:0-OH) | +ve | 718.5828           | 3.41 | IS_Cer_16:0-d31 |
| Hex-Cer_(34:1)    | +ve | 682.5616, 700.5722 | 3.30 | IS_Cer_16:0-d31 |
| Hex-Cer_(34:1-OH) | +ve | 716.5671           | 3.13 | IS_Cer_16:0-d31 |
| Hex-Cer_(34:2)    | +ve | 680.5460, 698.5565 | 3.13 | IS_Cer_16:0-d31 |
| Hex-Cer_(34:2-OH) | +ve | 714.5515           | 2.75 | IS_Cer_16:0-d31 |
| Hex-Cer_(35:0)    | +ve | 698.5929, 716.6035 | 3.93 | IS_Cer_16:0-d31 |
| Hex-Cer_(35:0-OH) | +ve | 732.5984           | 3.79 | IS_Cer_16:0-d31 |
| Hex-Cer_(35:1)    | +ve | 696.5773, 714.5878 | 3.71 | IS_Cer_16:0-d31 |
| Hex-Cer_(35:1-OH) | +ve | 730.5828           | 3.51 | IS_Cer_16:0-d31 |
| Hex-Cer_(35:2)    | +ve | 694.5616, 712.5722 | 3.51 | IS_Cer_16:0-d31 |
| Hex-Cer_(36:0)    | +ve | 712.6086, 730.6191 | 4.14 | IS_Cer_16:0-d31 |
| Hex-Cer_(36:0-OH) | +ve | 746.6141           | 4.04 | IS_Cer_16:0-d31 |
| Hex-Cer_(36:1)    | +ve | 710.5929, 728.6035 | 3.98 | IS_Cer_16:0-d31 |
| Hex-Cer_(36:1-OH) | +ve | 744.5984           | 3.91 | IS_Cer_16:0-d31 |
| Hex-Cer_(36:2)    | +ve | 708.5773, 726.5878 | 3.85 | IS_Cer_16:0-d31 |
| Hex-Cer_(36:2-OH) | +ve | 742.5828           | 3.43 | IS_Cer_16:0-d31 |
| Hex-Cer_(37:0)    | +ve | 726.6242, 744.6348 | 4.34 | IS_Cer_16:0-d31 |
| Hex-Cer_(37:0-OH) | +ve | 760.6297           | 4.26 | IS_Cer_16:0-d31 |
| Hex-Cer_(37:1)    | +ve | 724.6086, 742.6191 | 4.20 | IS_Cer_16:0-d31 |
| Hex-Cer_(37:1-OH) | +ve | 758.6141           | 4.08 | IS_Cer_16:0-d31 |
| Hex-Cer_(37:2)    | +ve | 722.5929, 740.6035 | 4.08 | IS_Cer_16:0-d31 |
| Hex-Cer_(38:0)    | +ve | 740.6399, 758.6504 | 4.51 | IS_Cer_16:0-d31 |
| Hex-Cer_(38:0-OH) | +ve | 774.6454           | 4.43 | IS_Cer_16:0-d31 |
| Hex-Cer_(38:1)    | +ve | 738.6242, 756.6348 | 4.38 | IS_Cer_16:0-d31 |
| Hex-Cer_(38:1-OH) | +ve | 772.6297           | 4.30 | IS_Cer_16:0-d31 |
| Hex-Cer_(38:2)    | +ve | 736.6086, 754.6191 | 4.30 | IS_Cer_16:0-d31 |
| Hex-Cer_(39:0)    | +ve | 754.6555, 772.6661 | 4.63 | IS_Cer_16:0-d31 |
| Hex-Cer_(39:0-OH) | +ve | 788.6610           | 4.58 | IS_Cer_16:0-d31 |
| Hex-Cer_(39:1)    | +ve | 752.6399, 770.6504 | 4.54 | IS_Cer_16:0-d31 |
| Hex-Cer_(39:2)    | +ve | 750.6242, 768.6348 | 4.47 | IS_Cer_16:0-d31 |
| Hex-Cer_(40:0)    | +ve | 768.6712, 786.6817 | 4.77 | IS_Cer_16:0-d31 |
| Hex-Cer_(40:0-OH) | +ve | 802.6767           | 4.72 | IS_Cer_16:0-d31 |
| Hex-Cer_(40:1)    | +ve | 766.6555, 784.6661 | 4.69 | IS_Cer_16:0-d31 |
| Hex-Cer_(40:1-OH) | +ve | 800.6610           | 4.62 | IS_Cer_16:0-d31 |
| Hex-Cer_(40:2)    | +ve | 764.6399, 782.6504 | 4.62 | IS_Cer_16:0-d31 |
| Hex-Cer_(40:2-OH) | +ve | 798.6454           | 4.30 | IS_Cer_16:0-d31 |
| Hex-Cer_(41:0)    | +ve | 782.6868, 800.6974 | 4.90 | IS_Cer_16:0-d31 |
| Hex-Cer_(41:0-OH) | +ve | 816.6923           | 4.85 | IS_Cer_16:0-d31 |
| Hex-Cer_(41:1)    | +ve | 780.6712, 798.6817 | 4.83 | IS_Cer_16:0-d31 |
| Hex-Cer_(41:2)    | +ve | 796.6661, 778.6555 | 4.76 | IS_Cer_16:0-d31 |
| Hex-Cer_(42:0)    | +ve | 796.7025, 814.7130 | 5.02 | IS_Cer_16:0-d31 |
| Hex-Cer_(42:0-OH) | +ve | 830.7080           | 4.98 | IS_Cer_16:0-d31 |
| Hex-Cer_(42:1)    | +ve | 794.6868, 812.6974 | 4.94 | IS_Cer_16:0-d31 |
| Hex-Cer_(42:1-OH) | +ve | 828.6923           | 4.88 | IS_Cer_16:0-d31 |
| Hex-Cer_(42:2)    | +ve | 792.6712, 810.6817 | 4.67 | IS_Cer_16:0-d31 |
| Hex-Cer_(42:2-OH) | +ve | 826.6767           | 4.60 | IS_Cer_16:0-d31 |
| Hex-Cer_(43:0)    | +ve | 810.7181, 828.7287 | 5.08 | IS_Cer_16:0-d31 |
| Hex-Cer_(43:0-OH) | +ve | 844.7236           | 4.96 | IS_Cer_16:0-d31 |
| Hex-Cer_(43:1)    | +ve | 808.7025, 826.7130 | 4.88 | IS_Cer_16:0-d31 |
| Hex-Cer_(43:2)    | +ve | 806.6868, 824.6974 | 4.81 | IS_Cer_16:0-d31 |
| Hex-Cer_(44:0)    | +ve | 824.7338, 842.7443 | 5.26 | IS_Cer_16:0-d31 |
| Hex-Cer_(44:1)    | +ve | 822.7181, 840.7287 | 5.02 | IS_Cer_16:0-d31 |
| Hex-Cer_(44:2)    | +ve | 820.7025, 838.7130 | 4.92 | IS_Cer_16:0-d31 |
| LPC_(12:0)        | +ve | 440.2772           | 0.40 | IS_LPC_14:0-d42 |

|            |     |          |      |                 |
|------------|-----|----------|------|-----------------|
| LPC_(14:0) | +ve | 468.3085 | 0.44 | IS_LPC_14:0-d42 |
| LPC_(14:1) | +ve | 466.2928 | 0.40 | IS_LPC_14:0-d42 |
| LPC_(15:0) | +ve | 482.3241 | 0.46 | IS_LPC_14:0-d42 |
| LPC_(15:1) | +ve | 480.3085 | 0.42 | IS_LPC_14:0-d42 |
| LPC_(16:0) | +ve | 496.3398 | 0.51 | IS_LPC_14:0-d42 |
| LPC_(16:1) | +ve | 494.3241 | 0.44 | IS_LPC_14:0-d42 |
| LPC_(17:0) | +ve | 510.3554 | 0.58 | IS_LPC_14:0-d42 |
| LPC_(17:1) | +ve | 508.3398 | 0.51 | IS_LPC_14:0-d42 |
| LPC_(18:0) | +ve | 524.3711 | 0.67 | IS_LPC_14:0-d42 |
| LPC_(18:1) | +ve | 522.3554 | 0.54 | IS_LPC_14:0-d42 |
| LPC_(18:2) | +ve | 520.3398 | 0.46 | IS_LPC_14:0-d42 |
| LPC_(18:3) | +ve | 518.3241 | 0.44 | IS_LPC_14:0-d42 |
| LPC_(18:4) | +ve | 516.3085 | 0.43 | IS_LPC_14:0-d42 |
| LPC_(19:0) | +ve | 538.3867 | 0.77 | IS_LPC_14:0-d42 |
| LPC_(20:0) | +ve | 552.4024 | 0.95 | IS_LPC_14:0-d42 |
| LPC_(20:3) | +ve | 546.3554 | 0.75 | IS_LPC_14:0-d42 |
| LPC_(20:4) | +ve | 544.3398 | 0.65 | IS_LPC_14:0-d42 |
| LPC_(20:5) | +ve | 542.3241 | 0.44 | IS_LPC_14:0-d42 |
| LPC_(21:0) | +ve | 566.4180 | 1.15 | IS_LPC_14:0-d42 |
| LPC_(22:4) | +ve | 572.3711 | 0.70 | IS_LPC_14:0-d42 |
| LPC_(22:5) | +ve | 570.3554 | 0.67 | IS_LPC_14:0-d42 |
| LPC_(22:6) | +ve | 568.3398 | 0.66 | IS_LPC_14:0-d42 |
| LPE_(14:0) | +ve | 426.2615 | 0.44 | IS_LPC_14:0-d42 |
| LPE_(15:0) | +ve | 440.2772 | 0.46 | IS_LPC_14:0-d42 |
| LPE_(16:0) | +ve | 454.2928 | 0.53 | IS_LPC_14:0-d42 |
| LPE_(16:1) | +ve | 452.2772 | 0.46 | IS_LPC_14:0-d42 |
| LPE_(17:0) | +ve | 468.3085 | 0.61 | IS_LPC_14:0-d42 |
| LPE_(17:1) | +ve | 466.2928 | 0.50 | IS_LPC_14:0-d42 |
| LPE_(18:0) | +ve | 482.3241 | 0.70 | IS_LPC_14:0-d42 |
| LPE_(18:1) | +ve | 480.3085 | 0.55 | IS_LPC_14:0-d42 |
| LPE_(18:2) | +ve | 478.2928 | 0.46 | IS_LPC_14:0-d42 |
| LPE_(18:3) | +ve | 476.2772 | 0.53 | IS_LPC_14:0-d42 |
| LPE_(18:4) | +ve | 474.2615 | 0.46 | IS_LPC_14:0-d42 |
| LPE_(19:0) | +ve | 496.3398 | 0.82 | IS_LPC_14:0-d42 |
| LPE_(20:0) | +ve | 510.3554 | 1.02 | IS_LPC_14:0-d42 |
| LPE_(20:3) | +ve | 504.3085 | 0.75 | IS_LPC_14:0-d42 |
| LPE_(20:4) | +ve | 502.2928 | 0.57 | IS_LPC_14:0-d42 |
| LPE_(20:5) | +ve | 500.2772 | 0.48 | IS_LPC_14:0-d42 |
| LPE_(22:4) | +ve | 530.3241 | 0.72 | IS_LPC_14:0-d42 |
| LPE_(22:5) | +ve | 528.3085 | 0.63 | IS_LPC_14:0-d42 |
| LPE_(22:6) | +ve | 526.2928 | 0.63 | IS_LPC_14:0-d42 |
| LPI_(16:0) | -ve | 571.2889 | 0.41 | IS_PI_34:1-d31  |
| LPI_(17:0) | -ve | 585.3045 | 0.45 | IS_PI_34:1-d31  |
| LPI_(18:0) | -ve | 599.3202 | 0.50 | IS_PI_34:1-d31  |
| LPI_(18:1) | -ve | 597.3045 | 0.43 | IS_PI_34:1-d31  |
| LPI_(18:2) | -ve | 595.2889 | 0.39 | IS_PI_34:1-d31  |
| LPI_(19:0) | -ve | 613.3358 | 0.55 | IS_PI_34:1-d31  |
| LPI_(20:0) | -ve | 627.3515 | 0.62 | IS_PI_34:1-d31  |
| LPI_(20:1) | -ve | 625.3358 | 0.50 | IS_PI_34:1-d31  |
| LPI_(20:2) | -ve | 623.3202 | 0.41 | IS_PI_34:1-d31  |
| LPI_(20:3) | -ve | 621.3045 | 0.41 | IS_PI_34:1-d31  |
| LPI_(20:4) | -ve | 619.2889 | 0.39 | IS_PI_34:1-d31  |
| LPI_(20:5) | -ve | 617.2732 | 0.35 | IS_PI_34:1-d31  |
| LPI_(21:0) | -ve | 641.3671 | 0.74 | IS_PI_34:1-d31  |
| LPI_(22:0) | -ve | 655.3828 | 0.90 | IS_PI_34:1-d31  |
| LPI_(22:1) | -ve | 653.3671 | 0.63 | IS_PI_34:1-d31  |
| LPI_(22:4) | -ve | 647.3202 | 0.41 | IS_PI_34:1-d31  |
| LPI_(22:5) | -ve | 645.3045 | 0.39 | IS_PI_34:1-d31  |



|                 |     |                              |      |                |
|-----------------|-----|------------------------------|------|----------------|
| LPI_(22:6)      | -ve | 643.2889                     | 0.37 | IS_PI_34:1-d31 |
| LPI_(24:1)      | -ve | 681.3984                     | 0.88 | IS_PI_34:1-d31 |
| LPS_(16:0)      | -ve | 496.2681                     | 0.47 | IS_PS_28:0-d54 |
| LPS_(17:0)      | -ve | 510.2838                     | 0.48 | IS_PS_28:0-d54 |
| LPS_(18:0)      | -ve | 524.2994                     | 0.52 | IS_PS_28:0-d54 |
| LPS_(18:1)      | -ve | 522.2838                     | 0.47 | IS_PS_28:0-d54 |
| LPS_(18:2)      | -ve | 520.2681                     | 0.45 | IS_PS_28:0-d54 |
| LPS_(19:0)      | -ve | 538.3151                     | 0.55 | IS_PS_28:0-d54 |
| LPS_(20:0)      | -ve | 552.3307                     | 0.64 | IS_PS_28:0-d54 |
| LPS_(20:1)      | -ve | 550.3151                     | 0.52 | IS_PS_28:0-d54 |
| LPS_(20:2)      | -ve | 548.2994                     | 0.47 | IS_PS_28:0-d54 |
| LPS_(20:3)      | -ve | 546.2838                     | 0.45 | IS_PS_28:0-d54 |
| LPS_(20:4)      | -ve | 544.2681                     | 0.43 | IS_PS_28:0-d54 |
| LPS_(20:5)      | -ve | 542.2525                     | 0.41 | IS_PS_28:0-d54 |
| LPS_(21:0)      | -ve | 566.3464                     | 0.78 | IS_PS_28:0-d54 |
| LPS_(22:0)      | -ve | 580.3620                     | 0.94 | IS_PS_28:0-d54 |
| LPS_(22:1)      | -ve | 578.3464                     | 0.66 | IS_PS_28:0-d54 |
| LPS_(22:2)      | -ve | 576.3307                     | 0.55 | IS_PS_28:0-d54 |
| LPS_(22:3)      | -ve | 574.3151                     | 0.50 | IS_PS_28:0-d54 |
| LPS_(22:4)      | -ve | 572.2994                     | 0.57 | IS_PS_28:0-d54 |
| LPS_(22:5)      | -ve | 570.2838                     | 0.43 | IS_PS_28:0-d54 |
| LPS_(24:0)      | -ve | 608.3933                     | 1.44 | IS_PS_28:0-d54 |
| Lyso_CL_(52:00) | -ve | 1169.7979                    | 5.00 | IS_TG_45:0-d87 |
| Lyso_CL_(52:01) | -ve | 1167.7822                    | 4.67 | IS_TG_45:0-d87 |
| Lyso_CL_(52:02) | -ve | 1165.7666                    | 4.66 | IS_TG_45:0-d87 |
| Lyso_CL_(52:03) | -ve | 1163.7509                    | 4.50 | IS_TG_45:0-d87 |
| Lyso_CL_(52:04) | -ve | 1161.7353                    | 4.30 | IS_TG_45:0-d87 |
| Lyso_CL_(52:05) | -ve | 1159.7196                    | 4.00 | IS_TG_45:0-d87 |
| Lyso_CL_(52:06) | -ve | 1157.7040                    | 3.80 | IS_TG_45:0-d87 |
| Lyso_CL_(53:00) | -ve | 1183.8135                    | 5.26 | IS_TG_45:0-d87 |
| Lyso_CL_(53:01) | -ve | 1181.7979                    | 5.15 | IS_TG_45:0-d87 |
| Lyso_CL_(53:02) | -ve | 1179.7822                    | 4.88 | IS_TG_45:0-d87 |
| Lyso_CL_(53:03) | -ve | 1177.7666                    | 4.69 | IS_TG_45:0-d87 |
| Lyso_CL_(53:04) | -ve | 1175.7509                    | 4.49 | IS_TG_45:0-d87 |
| Lyso_CL_(53:05) | -ve | 1173.7353                    | 4.20 | IS_TG_45:0-d87 |
| Lyso_CL_(53:06) | -ve | 1171.7196                    | 4.00 | IS_TG_45:0-d87 |
| Lyso_CL_(54:00) | -ve | 1197.8292                    | 5.50 | IS_TG_45:0-d87 |
| Lyso_CL_(54:01) | -ve | 1195.8135                    | 5.33 | IS_TG_45:0-d87 |
| Lyso_CL_(54:02) | -ve | 1193.7979                    | 4.88 | IS_TG_45:0-d87 |
| Lyso_CL_(54:03) | -ve | 1191.7822                    | 4.69 | IS_TG_45:0-d87 |
| Lyso_CL_(54:04) | -ve | 1189.7666                    | 4.53 | IS_TG_45:0-d87 |
| Lyso_CL_(54:05) | -ve | 1187.7509                    | 4.39 | IS_TG_45:0-d87 |
| Lyso_CL_(54:06) | -ve | 1185.7353                    | 4.18 | IS_TG_45:0-d87 |
| Lyso_CL_(56:05) | -ve | 1215.7822                    | 4.44 | IS_TG_45:0-d87 |
| Lyso_CL_(56:06) | -ve | 1213.7666                    | 4.43 | IS_TG_45:0-d87 |
| MG_(16:0)       | +ve | 313.2737, 353.2662, 369.2402 | 0.76 | IS_TG_45:0-d87 |
| PA_(30:0)       | -ve | 619.4344                     | 2.57 | IS_PA_34:1-d31 |
| PA_(30:1)       | -ve | 617.4188                     | 2.03 | IS_PA_34:1-d31 |
| PA_(32:0)       | -ve | 647.4657                     | 3.25 | IS_PA_34:1-d31 |
| PA_(32:1)       | -ve | 645.4501                     | 2.67 | IS_PA_34:1-d31 |
| PA_(32:2)       | -ve | 643.4344                     | 2.15 | IS_PA_34:1-d31 |
| PA_(33:1)       | -ve | 659.4657                     | 3.01 | IS_PA_34:1-d31 |
| PA_(34:0)       | -ve | 675.4970                     | 3.60 | IS_PA_34:1-d31 |
| PA_(34:1)       | -ve | 673.4814                     | 3.36 | IS_PA_34:1-d31 |
| PA_(34:2)       | -ve | 671.4657                     | 2.80 | IS_PA_34:1-d31 |
| PA_(34:3)       | -ve | 669.4501                     | 2.29 | IS_PA_34:1-d31 |
| PA_(35:0)       | -ve | 689.5127                     | 3.88 | IS_PA_34:1-d31 |
| PA_(35:1)       | -ve | 687.4970                     | 3.76 | IS_PA_34:1-d31 |

|                   |     |          |      |                |
|-------------------|-----|----------|------|----------------|
| PA_(35:2)         | -ve | 685.4814 | 3.17 | IS_PA_34:1-d31 |
| PA_(36:0)         | -ve | 703.5283 | 4.02 | IS_PA_34:1-d31 |
| PA_(36:1)         | -ve | 701.5127 | 3.84 | IS_PA_34:1-d31 |
| PA_(36:2)         | -ve | 699.4970 | 3.54 | IS_PA_34:1-d31 |
| PA_(36:3)         | -ve | 697.4814 | 2.89 | IS_PA_34:1-d31 |
| PA_(36:4)         | -ve | 695.4657 | 2.70 | IS_PA_34:1-d31 |
| PA_(38:1)         | -ve | 729.5440 | 4.40 | IS_PA_34:1-d31 |
| PA_(38:2)         | -ve | 727.5283 | 4.04 | IS_PA_34:1-d31 |
| PA_(38:3)         | -ve | 725.5127 | 3.80 | IS_PA_34:1-d31 |
| PA_(38:4)         | -ve | 723.4970 | 3.45 | IS_PA_34:1-d31 |
| PA_(38:5)         | -ve | 721.4814 | 3.01 | IS_PA_34:1-d31 |
| PA_(38:6)         | -ve | 719.4657 | 2.57 | IS_PA_34:1-d31 |
| PA_(40:5)         | -ve | 749.5127 | 3.76 | IS_PA_34:1-d31 |
| PA_(40:6)         | -ve | 747.4970 | 3.25 | IS_PA_34:1-d31 |
| PC_(30:0)         | +ve | 707.5381 | 3.10 | IS_PC_34:1-d31 |
| PC_(30:1)         | +ve | 704.5225 | 2.51 | IS_PC_34:1-d31 |
| PC_(31:0)         | +ve | 720.5538 | 3.57 | IS_PC_34:1-d31 |
| PC_(32:0)         | +ve | 734.5694 | 3.87 | IS_PC_34:1-d31 |
| PC_(32:1)         | +ve | 732.5538 | 3.23 | IS_PC_34:1-d31 |
| PC_(32:2)         | +ve | 730.5381 | 2.65 | IS_PC_34:1-d31 |
| PC_(33:0)         | +ve | 748.5851 | 4.08 | IS_PC_34:1-d31 |
| PC_(33:1)         | +ve | 746.5694 | 3.61 | IS_PC_34:1-d31 |
| PC_(33:2)         | +ve | 744.5538 | 3.00 | IS_PC_34:1-d31 |
| PC_(34:0)         | +ve | 762.6007 | 4.28 | IS_PC_34:1-d31 |
| PC_(34:1)         | +ve | 760.5851 | 3.91 | IS_PC_34:1-d31 |
| PC_(34:2)         | +ve | 758.5694 | 3.40 | IS_PC_34:1-d31 |
| PC_(34:3)         | +ve | 756.5538 | 2.88 | IS_PC_34:1-d31 |
| PC_(34:4)         | +ve | 754.5381 | 2.56 | IS_PC_34:1-d31 |
| PC_(35:0)         | +ve | 776.6164 | 4.41 | IS_PC_34:1-d31 |
| PC_(35:1)         | +ve | 774.6007 | 4.14 | IS_PC_34:1-d31 |
| PC_(35:2)         | +ve | 772.5851 | 3.77 | IS_PC_34:1-d31 |
| PC_(36:0)         | +ve | 790.6320 | 4.58 | IS_PC_34:1-d31 |
| PC_(36:1)         | +ve | 788.6164 | 4.32 | IS_PC_34:1-d31 |
| PC_(36:2)         | +ve | 786.6007 | 4.02 | IS_PC_34:1-d31 |
| PC_(36:3)         | +ve | 784.5851 | 3.48 | IS_PC_34:1-d31 |
| PC_(36:4)         | +ve | 782.5694 | 3.29 | IS_PC_34:1-d31 |
| PC_(37:0)         | +ve | 804.6477 | 4.66 | IS_PC_34:1-d31 |
| PC_(37:1)         | +ve | 802.6320 | 4.48 | IS_PC_34:1-d31 |
| PC_(37:2)         | +ve | 800.6164 | 4.18 | IS_PC_34:1-d31 |
| PC_(37:3)         | +ve | 798.6007 | 3.84 | IS_PC_34:1-d31 |
| PC_(37:4)         | +ve | 796.5851 | 3.72 | IS_PC_34:1-d31 |
| PC_(37:5)         | +ve | 794.5694 | 3.00 | IS_PC_34:1-d31 |
| PC_(37:6)         | +ve | 792.5538 | 2.74 | IS_PC_34:1-d31 |
| PC_(38:0)         | +ve | 818.6633 | 4.84 | IS_PC_34:1-d31 |
| PC_(38:1)         | +ve | 816.6477 | 4.62 | IS_PC_34:1-d31 |
| PC_(38:2)         | +ve | 814.6320 | 4.36 | IS_PC_34:1-d31 |
| PC_(38:3)         | +ve | 812.6164 | 4.16 | IS_PC_34:1-d31 |
| PC_(38:4)         | +ve | 810.6007 | 3.95 | IS_PC_34:1-d31 |
| PC_(38:5)         | +ve | 808.5851 | 3.13 | IS_PC_34:1-d31 |
| PC_(38:6)         | +ve | 806.5694 | 3.11 | IS_PC_34:1-d31 |
| PC_(40:2)         | +ve | 842.6633 | 4.68 | IS_PC_34:1-d31 |
| PC_(40:3)         | +ve | 840.6477 | 4.50 | IS_PC_34:1-d31 |
| PC_(40:4)         | +ve | 838.6320 | 4.24 | IS_PC_34:1-d31 |
| PC_(40:5)         | +ve | 836.6164 | 4.12 | IS_PC_34:1-d31 |
| PC_(40:6)         | +ve | 834.6007 | 4.06 | IS_PC_34:1-d31 |
| PC_(40:7)         | +ve | 832.5851 | 3.91 | IS_PC_34:1-d31 |
| PC_C18(plas)-18:1 | +ve | 772.6214 | 4.46 | IS_PC_34:1-d31 |
| PE_(30:0)         | +ve | 664.4912 | 3.32 | IS_PE_34:1-d31 |

|            |     |          |      |                |
|------------|-----|----------|------|----------------|
| PE_(32:0)  | +ve | 692.5225 | 4.00 | IS_PE_34:1-d31 |
| PE_(32:1)  | +ve | 690.5068 | 3.41 | IS_PE_34:1-d31 |
| PE_(34:0)  | +ve | 720.5538 | 4.39 | IS_PE_34:1-d31 |
| PE_(34:1)  | +ve | 718.5381 | 4.06 | IS_PE_34:1-d31 |
| PE_(34:2)  | +ve | 716.5225 | 3.63 | IS_PE_34:1-d31 |
| PE_(35:1)  | +ve | 732.5538 | 4.23 | IS_PE_34:1-d31 |
| PE_(36:0)  | +ve | 748.5851 | 4.69 | IS_PE_34:1-d31 |
| PE_(36:1)  | +ve | 746.5694 | 4.43 | IS_PE_34:1-d31 |
| PE_(36:2)  | +ve | 744.5538 | 4.13 | IS_PE_34:1-d31 |
| PE_(36:3)  | +ve | 742.5381 | 3.70 | IS_PE_34:1-d31 |
| PE_(36:4)  | +ve | 740.5225 | 3.49 | IS_PE_34:1-d31 |
| PE_(38:0)  | +ve | 776.6164 | 4.89 | IS_PE_34:1-d31 |
| PE_(38:1)  | +ve | 774.6007 | 4.71 | IS_PE_34:1-d31 |
| PE_(38:2)  | +ve | 772.5851 | 4.49 | IS_PE_34:1-d31 |
| PE_(38:3)  | +ve | 770.5694 | 4.24 | IS_PE_34:1-d31 |
| PE_(38:4)  | +ve | 768.5538 | 4.08 | IS_PE_34:1-d31 |
| PE_(38:5)  | +ve | 766.5381 | 3.79 | IS_PE_34:1-d31 |
| PE_(38:6)  | +ve | 764.5225 | 3.29 | IS_PE_34:1-d31 |
| PG_(32:0)  | -ve | 721.5025 | 2.99 | IS_PG_34:1-d31 |
| PG_(33:0)  | -ve | 735.5182 | 3.35 | IS_PG_34:1-d31 |
| PG_(34:0)  | -ve | 749.5338 | 3.71 | IS_PG_34:1-d31 |
| PG_(34:1)  | -ve | 747.5182 | 3.08 | IS_PG_34:1-d31 |
| PG_(35:0)  | -ve | 763.5495 | 3.95 | IS_PG_34:1-d31 |
| PG_(35:1)  | -ve | 761.5338 | 3.45 | IS_PG_34:1-d31 |
| PG_(36:0)  | -ve | 777.5651 | 4.15 | IS_PG_34:1-d31 |
| PG_(36:1)  | -ve | 775.5495 | 3.78 | IS_PG_34:1-d31 |
| PG_(36:2)  | -ve | 773.5338 | 3.26 | IS_PG_34:1-d31 |
| PG_(36:3)  | -ve | 771.5182 | 2.70 | IS_PG_34:1-d31 |
| PG_(36:4)  | -ve | 769.5025 | 2.52 | IS_PG_34:1-d31 |
| PG_(38:0)  | -ve | 805.5964 | 4.47 | IS_PG_34:1-d31 |
| PG_(38:1)  | -ve | 803.5808 | 4.17 | IS_PG_34:1-d31 |
| PG_(38:2)  | -ve | 801.5651 | 3.76 | IS_PG_34:1-d31 |
| PG_(38:3)  | -ve | 799.5495 | 3.49 | IS_PG_34:1-d31 |
| PG_(38:4)  | -ve | 797.5338 | 3.17 | IS_PG_34:1-d31 |
| PG_(38:5)  | -ve | 795.5182 | 2.79 | IS_PG_34:1-d31 |
| PG_(38:6)  | -ve | 793.5025 | 2.39 | IS_PG_34:1-d31 |
| PG_(38:7)  | -ve | 791.4869 | 2.23 | IS_PG_34:1-d31 |
| PG_(40:0)  | -ve | 833.6277 | 4.71 | IS_PG_34:1-d31 |
| PG_(40:1)  | -ve | 831.6121 | 4.49 | IS_PG_34:1-d31 |
| PG_(40:2)  | -ve | 829.5964 | 4.25 | IS_PG_34:1-d31 |
| PG_(40:3)  | -ve | 827.5808 | 3.97 | IS_PG_34:1-d31 |
| PG_(40:4)  | -ve | 825.5651 | 3.67 | IS_PG_34:1-d31 |
| PG_(40:5)  | -ve | 823.5495 | 3.45 | IS_PG_34:1-d31 |
| PG_(40:6)  | -ve | 821.5338 | 3.01 | IS_PG_34:1-d31 |
| PG_(40:7)  | -ve | 819.5182 | 2.69 | IS_PG_34:1-d31 |
| PG_(40:8)  | -ve | 817.5025 | 2.38 | IS_PG_34:1-d31 |
| PG_(42:5)  | -ve | 851.5808 | 3.85 | IS_PG_34:1-d31 |
| PG_(42:6)  | -ve | 849.5651 | 3.45 | IS_PG_34:1-d31 |
| PG_(42:7)  | -ve | 847.5495 | 3.01 | IS_PG_34:1-d31 |
| PG_(42:8)  | -ve | 845.5338 | 2.54 | IS_PG_34:1-d31 |
| PG_(42:10) | -ve | 841.5025 | 2.80 | IS_PG_34:1-d31 |
| PG_(42:11) | -ve | 839.4869 | 2.51 | IS_PG_34:1-d31 |
| PI_(32:0)  | -ve | 809.5186 | 2.82 | IS_PI_34:1-d31 |
| PI_(33:0)  | -ve | 823.5342 | 3.18 | IS_PI_34:1-d31 |
| PI_(34:0)  | -ve | 837.5499 | 3.54 | IS_PI_34:1-d31 |
| PI_(34:1)  | -ve | 835.5342 | 2.91 | IS_PI_34:1-d31 |
| PI_(34:2)  | -ve | 833.5186 | 2.42 | IS_PI_34:1-d31 |
| PI_(35:0)  | -ve | 851.5655 | 3.78 | IS_PI_34:1-d31 |

|             |     |          |      |                |
|-------------|-----|----------|------|----------------|
| PI_(35:1)   | -ve | 849.5499 | 3.26 | IS_PI_34:1-d31 |
| PI_(35:2)   | -ve | 847.5342 | 2.76 | IS_PI_34:1-d31 |
| PI_(36:0)   | -ve | 865.5812 | 4.06 | IS_PI_34:1-d31 |
| PI_(36:1)   | -ve | 863.5655 | 3.65 | IS_PI_34:1-d31 |
| PI_(36:2)   | -ve | 861.5499 | 3.11 | IS_PI_34:1-d31 |
| PI_(36:3)   | -ve | 859.5342 | 2.60 | IS_PI_34:1-d31 |
| PI_(36:4)   | -ve | 857.5186 | 2.35 | IS_PI_34:1-d31 |
| PI_(38:3)   | -ve | 887.5655 | 3.31 | IS_PI_34:1-d31 |
| PI_(38:4)   | -ve | 885.5499 | 3.00 | IS_PI_34:1-d31 |
| PI_(38:5)   | -ve | 883.5342 | 2.54 | IS_PI_34:1-d31 |
| PI_(40:3)   | -ve | 915.5968 | 3.88 | IS_PI_34:1-d31 |
| PI_(40:4)   | -ve | 913.5812 | 3.52 | IS_PI_34:1-d31 |
| PI_(40:5)   | -ve | 911.5655 | 3.20 | IS_PI_34:1-d31 |
| PI_(40:6)   | -ve | 909.5499 | 2.86 | IS_PI_34:1-d31 |
| PI_(40:8)   | -ve | 905.5186 | 1.81 | IS_PI_34:1-d31 |
| PS_(32:0)   | -ve | 734.4978 | 2.89 | IS_PS_28:0-d54 |
| PS_(32:1)   | -ve | 732.4821 | 2.32 | IS_PS_28:0-d54 |
| PS_(33:0)   | -ve | 706.4665 | 3.07 | IS_PS_28:0-d54 |
| PS_(33:1)   | -ve | 746.4978 | 2.65 | IS_PS_28:0-d54 |
| PS_(34:0)   | -ve | 762.5291 | 3.38 | IS_PS_28:0-d54 |
| PS_(34:1)   | -ve | 760.5134 | 2.99 | IS_PS_28:0-d54 |
| PS_(34:2)   | -ve | 758.4978 | 2.47 | IS_PS_28:0-d54 |
| PS_(34:3)   | -ve | 756.4821 | 2.02 | IS_PS_28:0-d54 |
| PS_(35:0)   | -ve | 776.5447 | 3.67 | IS_PS_28:0-d54 |
| PS_(35:1)   | -ve | 774.5291 | 3.36 | IS_PS_28:0-d54 |
| PS_(35:2)   | -ve | 772.5134 | 2.81 | IS_PS_28:0-d54 |
| PS_(36:0)   | -ve | 790.5604 | 4.13 | IS_PS_28:0-d54 |
| PS_(36:1)   | -ve | 788.5447 | 3.74 | IS_PS_28:0-d54 |
| PS_(36:2)   | -ve | 786.5291 | 3.16 | IS_PS_28:0-d54 |
| PS_(36:3)   | -ve | 784.5134 | 2.56 | IS_PS_28:0-d54 |
| PS_(38:0)   | -ve | 818.5917 | 4.47 | IS_PS_28:0-d54 |
| PS_(38:1)   | -ve | 816.5760 | 4.17 | IS_PS_28:0-d54 |
| PS_(38:2)   | -ve | 814.5604 | 3.88 | IS_PS_28:0-d54 |
| PS_(38:3)   | -ve | 812.5447 | 3.22 | IS_PS_28:0-d54 |
| PS_(38:4)   | -ve | 810.5291 | 3.18 | IS_PS_28:0-d54 |
| PS_(38:5)   | -ve | 808.5134 | 3.16 | IS_PS_28:0-d54 |
| PS_(38:6)   | -ve | 806.4978 | 2.59 | IS_PS_28:0-d54 |
| PS_(40:0)   | -ve | 846.6230 | 4.73 | IS_PS_28:0-d54 |
| PS_(40:1)   | -ve | 844.6073 | 4.51 | IS_PS_28:0-d54 |
| PS_(40:2)   | -ve | 842.5917 | 4.27 | IS_PS_28:0-d54 |
| PS_(40:3)   | -ve | 840.5760 | 3.71 | IS_PS_28:0-d54 |
| PS_(40:4)   | -ve | 838.5604 | 3.45 | IS_PS_28:0-d54 |
| PS_(40:5)   | -ve | 836.5447 | 3.27 | IS_PS_28:0-d54 |
| PS_(40:6)   | -ve | 834.5291 | 2.94 | IS_PS_28:0-d54 |
| PS_(40:7)   | -ve | 832.5134 | 2.69 | IS_PS_28:0-d54 |
| PS_(42:1)   | -ve | 872.6386 | 4.55 | IS_PS_28:0-d54 |
| PS_(42:2)   | -ve | 870.6230 | 4.28 | IS_PS_28:0-d54 |
| PS_(42:3)   | -ve | 868.6073 | 4.18 | IS_PS_28:0-d54 |
| PS_(42:5)   | -ve | 864.5760 | 3.74 | IS_PS_28:0-d54 |
| PS_(42:6)   | -ve | 862.5604 | 3.22 | IS_PS_28:0-d54 |
| PS_(42:9)   | -ve | 856.5134 | 2.89 | IS_PS_28:0-d54 |
| S_(30:1)    | -ve | 722.4519 | 1.01 | IS_PG_34:1-d31 |
| S_(32:0)    | -ve | 752.4988 | 1.71 | IS_PG_34:1-d31 |
| S_(32:1)    | -ve | 750.4832 | 1.45 | IS_PG_34:1-d31 |
| S_(32:1-OH) | -ve | 766.4781 | 1.31 | IS_PG_34:1-d31 |
| S_(32:2)    | -ve | 748.4675 | 1.06 | IS_PG_34:1-d31 |
| S_(33:0)    | -ve | 766.5145 | 2.05 | IS_PG_34:1-d31 |
| S_(33:1)    | -ve | 764.4988 | 1.80 | IS_PG_34:1-d31 |

|             |     |          |      |                |
|-------------|-----|----------|------|----------------|
| S_(33:1-OH) | -ve | 780.4937 | 1.67 | IS_PG_34:1-d31 |
| S_(33:2)    | -ve | 762.4832 | 1.29 | IS_PG_34:1-d31 |
| S_(34:0)    | -ve | 780.5301 | 2.39 | IS_PG_34:1-d31 |
| S_(34:1)    | -ve | 778.5145 | 2.15 | IS_PG_34:1-d31 |
| S_(34:1-OH) | -ve | 794.5094 | 2.03 | IS_PG_34:1-d31 |
| S_(34:2)    | -ve | 776.4988 | 1.59 | IS_PG_34:1-d31 |
| S_(35:0)    | -ve | 794.5458 | 2.70 | IS_PG_34:1-d31 |
| S_(35:1)    | -ve | 792.5301 | 2.49 | IS_PG_34:1-d31 |
| S_(35:1-OH) | -ve | 808.5250 | 2.35 | IS_PG_34:1-d31 |
| S_(35:2)    | -ve | 790.5145 | 1.97 | IS_PG_34:1-d31 |
| S_(36:0)    | -ve | 808.5614 | 3.02 | IS_PG_34:1-d31 |
| S_(36:1)    | -ve | 806.5458 | 2.79 | IS_PG_34:1-d31 |
| S_(36:1-OH) | -ve | 822.5407 | 2.66 | IS_PG_34:1-d31 |
| S_(36:2)    | -ve | 804.5301 | 2.43 | IS_PG_34:1-d31 |
| S_(36:2-OH) | -ve | 820.5250 | 2.15 | IS_PG_34:1-d31 |
| S_(37:0)    | -ve | 822.5771 | 3.40 | IS_PG_34:1-d31 |
| S_(37:1)    | -ve | 820.5614 | 3.14 | IS_PG_34:1-d31 |
| S_(37:1-OH) | -ve | 836.5563 | 3.01 | IS_PG_34:1-d31 |
| S_(37:2)    | -ve | 818.5458 | 2.55 | IS_PG_34:1-d31 |
| S_(37:2-OH) | -ve | 834.5407 | 2.47 | IS_PG_34:1-d31 |
| S_(38:0)    | -ve | 836.5927 | 3.75 | IS_PG_34:1-d31 |
| S_(38:1)    | -ve | 834.5771 | 3.52 | IS_PG_34:1-d31 |
| S_(38:1-OH) | -ve | 850.5720 | 3.36 | IS_PG_34:1-d31 |
| S_(38:2)    | -ve | 832.5614 | 2.85 | IS_PG_34:1-d31 |
| S_(38:2-OH) | -ve | 848.5563 | 2.74 | IS_PG_34:1-d31 |
| S_(39:0)    | -ve | 850.6084 | 3.96 | IS_PG_34:1-d31 |
| S_(39:1)    | -ve | 848.5927 | 3.83 | IS_PG_34:1-d31 |
| S_(39:1-OH) | -ve | 864.5876 | 3.69 | IS_PG_34:1-d31 |
| S_(39:2)    | -ve | 846.5771 | 3.16 | IS_PG_34:1-d31 |
| S_(39:2-OH) | -ve | 862.5720 | 3.02 | IS_PG_34:1-d31 |
| S_(40:0)    | -ve | 864.6240 | 4.15 | IS_PG_34:1-d31 |
| S_(40:1)    | -ve | 862.6084 | 4.03 | IS_PG_34:1-d31 |
| S_(40:1-OH) | -ve | 878.6033 | 3.96 | IS_PG_34:1-d31 |
| S_(40:2)    | -ve | 860.5927 | 3.52 | IS_PG_34:1-d31 |
| S_(40:2-OH) | -ve | 876.5876 | 3.38 | IS_PG_34:1-d31 |
| S_(41:0)    | -ve | 878.6397 | 4.29 | IS_PG_34:1-d31 |
| S_(41:1)    | -ve | 876.6240 | 4.20 | IS_PG_34:1-d31 |
| S_(41:2)    | -ve | 874.6084 | 3.83 | IS_PG_34:1-d31 |
| S_(42:0)    | -ve | 892.6553 | 4.43 | IS_PG_34:1-d31 |
| S_(42:1)    | -ve | 890.6397 | 4.35 | IS_PG_34:1-d31 |
| S_(42:1-OH) | -ve | 906.6346 | 4.29 | IS_PG_34:1-d31 |
| S_(42:2)    | -ve | 888.6240 | 4.01 | IS_PG_34:1-d31 |
| S_(42:2-OH) | -ve | 904.6186 | 3.94 | IS_PG_34:1-d31 |
| S_(43:0)    | -ve | 906.6710 | 4.57 | IS_PG_34:1-d31 |
| S_(43:1)    | -ve | 904.6553 | 4.49 | IS_PG_34:1-d31 |
| S_(43:2)    | -ve | 902.6397 | 4.19 | IS_PG_34:1-d31 |
| S_(44:0)    | -ve | 920.6866 | 4.68 | IS_PG_34:1-d31 |
| S_(44:1)    | -ve | 918.6710 | 4.60 | IS_PG_34:1-d31 |
| S_(44:1-OH) | -ve | 934.6659 | 4.57 | IS_PG_34:1-d31 |
| S_(44:2)    | -ve | 916.6553 | 4.35 | IS_PG_34:1-d31 |
| S_(44:2-OH) | -ve | 932.6502 | 4.28 | IS_PG_34:1-d31 |
| S_(45:0)    | -ve | 934.7023 | 4.71 | IS_PG_34:1-d31 |
| S_(45:1)    | -ve | 932.6866 | 4.70 | IS_PG_34:1-d31 |
| S_(45:2)    | -ve | 930.6710 | 4.47 | IS_PG_34:1-d31 |
| S_(46:0)    | -ve | 948.7179 | 4.88 | IS_PG_34:1-d31 |
| S_(46:1)    | -ve | 946.7023 | 4.80 | IS_PG_34:1-d31 |
| S_(46:1-OH) | -ve | 962.6972 | 4.78 | IS_PG_34:1-d31 |
| S_(46:2)    | -ve | 944.6866 | 4.58 | IS_PG_34:1-d31 |

|              |     |                              |      |                |
|--------------|-----|------------------------------|------|----------------|
| S_(46:2-OH)  | -ve | 960.6815                     | 4.58 | IS_PG_34:1-d31 |
| S_(47:2)     | -ve | 958.7023                     | 4.70 | IS_PG_34:1-d31 |
| S_(48:0)     | -ve | 976.7492                     | 4.93 | IS_PG_34:1-d31 |
| S_(48:1)     | -ve | 974.7336                     | 4.84 | IS_PG_34:1-d31 |
| S_(48:1-OH)  | -ve | 990.7285                     | 4.82 | IS_PG_34:1-d31 |
| S_(48:2)     | -ve | 972.7179                     | 4.80 | IS_PG_34:1-d31 |
| S_(48:2-OH)  | -ve | 988.7128                     | 4.76 | IS_PG_34:1-d31 |
| SM_(30:0)    | +ve | 649.5279, 671.5098, 687.4838 | 1.86 | IS_SM_34:1-d31 |
| SM_(30:1)    | +ve | 647.5122, 669.4942, 685.4681 | 1.60 | IS_SM_34:1-d31 |
| SM_(32:0)    | +ve | 677.5592, 699.5411, 715.5151 | 2.57 | IS_SM_34:1-d31 |
| SM_(32:1)    | +ve | 675.5435, 697.5255, 713.4994 | 2.33 | IS_SM_34:1-d31 |
| SM_(33:0)    | +ve | 691.5748, 713.5568, 729.5307 | 2.93 | IS_SM_34:1-d31 |
| SM_(33:1)    | +ve | 689.5592, 711.5411, 727.5151 | 2.67 | IS_SM_34:1-d31 |
| SM_(34:0)    | +ve | 705.5905, 727.5725, 743.5464 | 3.32 | IS_SM_34:1-d31 |
| SM_(34:0-OH) | +ve | 721.5854                     | 2.91 | IS_SM_34:1-d31 |
| SM_(34:1)    | +ve | 703.5748, 725.5568, 741.5307 | 3.04 | IS_SM_34:1-d31 |
| SM_(34:1-OH) | +ve | 719.5698                     | 2.62 | IS_SM_34:1-d31 |
| SM_(34:2)    | +ve | 701.5592, 723.5411, 739.5151 | 2.47 | IS_SM_34:1-d31 |
| SM_(34:2-OH) | +ve | 717.5541                     | 2.20 | IS_SM_34:1-d31 |
| SM_(35:0)    | +ve | 719.6061, 741.5881, 757.5620 | 3.76 | IS_SM_34:1-d31 |
| SM_(35:1)    | +ve | 717.5905, 739.5724, 755.5464 | 3.44 | IS_SM_34:1-d31 |
| SM_(35:2)    | +ve | 715.5748, 737.5568, 753.5307 | 2.83 | IS_SM_34:1-d31 |
| SM_(36:0)    | +ve | 733.6218, 755.6037, 771.5777 | 4.00 | IS_SM_34:1-d31 |
| SM_(36:0-OH) | +ve | 749.6167                     | 3.84 | IS_SM_34:1-d31 |
| SM_(36:1)    | +ve | 731.6061, 753.5881, 769.5620 | 3.82 | IS_SM_34:1-d31 |
| SM_(36:1-OH) | +ve | 747.6011                     | 3.58 | IS_SM_34:1-d31 |
| SM_(36:2)    | +ve | 729.5905, 751.5724, 767.5464 | 3.19 | IS_SM_34:1-d31 |
| SM_(36:3)    | +ve | 727.5748, 749.5568, 765.5307 | 2.63 | IS_SM_34:1-d31 |
| SM_(37:0)    | +ve | 747.6374, 769.6194, 785.5933 | 4.22 | IS_SM_34:1-d31 |
| SM_(37:1)    | +ve | 745.6218, 767.6037, 783.5777 | 4.06 | IS_SM_34:1-d31 |
| SM_(37:2)    | +ve | 743.6061, 765.5881, 781.5620 | 3.62 | IS_SM_34:1-d31 |
| SM_(38:0)    | +ve | 761.6531, 783.6350, 799.6090 | 4.39 | IS_SM_34:1-d31 |
| SM_(38:0-OH) | +ve | 777.6480                     | 4.34 | IS_SM_34:1-d31 |
| SM_(38:1)    | +ve | 759.6374, 781.6194, 797.5933 | 4.26 | IS_SM_34:1-d31 |
| SM_(38:1-OH) | +ve | 775.6324                     | 4.14 | IS_SM_34:1-d31 |
| SM_(38:2)    | +ve | 757.6218, 779.6037, 795.5777 | 3.94 | IS_SM_34:1-d31 |
| SM_(38:3)    | +ve | 755.6061, 777.5881, 793.5620 | 3.79 | IS_SM_34:1-d31 |
| SM_(39:0)    | +ve | 775.6687, 797.6507, 813.6246 | 4.56 | IS_SM_34:1-d31 |
| SM_(39:1)    | +ve | 773.6531, 795.6350, 811.6090 | 4.45 | IS_SM_34:1-d31 |
| SM_(40:0)    | +ve | 789.6844, 811.6663, 827.6403 | 4.70 | IS_SM_34:1-d31 |
| SM_(40:0-OH) | +ve | 805.6793                     | 4.45 | IS_SM_34:1-d31 |
| SM_(40:1)    | +ve | 787.6687, 809.6507, 825.6246 | 4.39 | IS_SM_34:1-d31 |
| SM_(40:1-OH) | +ve | 803.6637                     | 4.11 | IS_SM_34:1-d31 |
| SM_(40:2)    | +ve | 785.6531, 807.6350, 823.6090 | 4.27 | IS_SM_34:1-d31 |
| SM_(41:0)    | +ve | 803.7000, 825.6820, 841.6559 | 4.82 | IS_SM_34:1-d31 |
| SM_(41:1)    | +ve | 801.6844, 823.6663, 839.6403 | 4.74 | IS_SM_34:1-d31 |
| SM_(42:0)    | +ve | 817.7157, 839.6976, 855.6716 | 4.94 | IS_SM_34:1-d31 |
| SM_(42:0-OH) | +ve | 833.7106                     | 4.74 | IS_SM_34:1-d31 |
| SM_(42:1)    | +ve | 815.7000, 837.6820, 853.6559 | 4.70 | IS_SM_34:1-d31 |
| SM_(42:2)    | +ve | 813.6844, 835.6663, 851.6403 | 4.58 | IS_SM_34:1-d31 |
| SM_(43:0)    | +ve | 831.7313, 853.7133, 869.6872 | 5.04 | IS_SM_34:1-d31 |
| SM_(43:1)    | +ve | 829.7157, 851.6976, 867.6716 | 4.96 | IS_SM_34:1-d31 |
| SM_(44:0)    | +ve | 845.7470, 867.7289, 883.7029 | 5.18 | IS_SM_34:1-d31 |
| SM_(44:1)    | +ve | 843.7313, 865.7133, 881.6872 | 5.10 | IS_SM_34:1-d31 |
| SM_(44:2)    | +ve | 841.7157, 863.6976, 879.6716 | 4.91 | IS_SM_34:1-d31 |
| SM_(45:0)    | +ve | 859.7626, 881.7446, 897.7185 | 5.28 | IS_SM_34:1-d31 |
| SM_(45:1)    | +ve | 857.7470, 879.7289, 895.7029 | 5.18 | IS_SM_34:1-d31 |
| SM_(46:0)    | +ve | 873.7783, 895.7602, 911.7342 | 5.60 | IS_SM_34:1-d31 |

|           |     |                                        |      |                |
|-----------|-----|----------------------------------------|------|----------------|
| SM_(46:1) | +ve | 871.7626, 893.7446, 909.7185           | 5.33 | IS_SM_34:1-d31 |
| SM_(48:0) | +ve | 901.8096, 923.7915, 939.7655           | 6.00 | IS_SM_34:1-d31 |
| SM_(48:2) | +ve | 897.7783, 919.7602, 935.7342           | 5.31 | IS_SM_34:1-d31 |
| TG_(06:0) | +ve | 219.0863, 236.1129, 241.0683, 257.0422 | 0.34 | IS_TG_45:0-d87 |
| TG_(12:0) | +ve | 303.1802, 320.2068, 325.1622, 341.1361 | 0.42 | IS_TG_45:0-d87 |
| TG_(18:0) | +ve | 387.2741, 404.3007, 409.2561, 425.2300 | 0.66 | IS_TG_45:0-d87 |
| TG_(24:0) | +ve | 471.3680, 488.3946, 493.3500, 509.3239 | 1.99 | IS_TG_45:0-d87 |
| TG_(30:0) | +ve | 555.4619, 572.4885, 577.4439, 593.4178 | 4.01 | IS_TG_45:0-d87 |
| TG_(36:0) | +ve | 639.5558, 656.5824, 661.5378, 677.5117 | 5.01 | IS_TG_45:0-d87 |
| TG_(44:1) | +ve | 749.6654, 766.6919, 771.6473, 787.6212 | 5.66 | IS_TG_45:0-d87 |
| TG_(45:0) | +ve | 765.6967, 782.7232, 787.6786, 803.6525 | 5.95 | IS_TG_45:0-d87 |
| TG_(45:1) | +ve | 780.7076, 785.6630, 793.6810, 801.6369 | 5.78 | IS_TG_45:0-d87 |
| TG_(45:2) | +ve | 761.6654, 778.6919, 783.6473, 799.6212 | 5.59 | IS_TG_45:0-d87 |
| TG_(46:1) | +ve | 777.6967, 794.7232, 799.6786, 815.6525 | 5.89 | IS_TG_45:0-d87 |
| TG_(46:2) | +ve | 775.6810, 792.7076, 797.6630, 813.6369 | 5.66 | IS_TG_45:0-d87 |
| TG_(46:4) | +ve | 771.6497, 788.6763, 793.6317, 809.6056 | 5.38 | IS_TG_45:0-d87 |
| TG_(47:0) | +ve | 793.7280, 810.7545, 815.7099, 931.6838 | 6.16 | IS_TG_45:0-d87 |
| TG_(47:1) | +ve | 791.7123, 808.7389, 813.6943, 829.6682 | 5.99 | IS_TG_45:0-d87 |
| TG_(47:2) | +ve | 789.6967, 806.7232, 811.6786, 827.6525 | 5.80 | IS_TG_45:0-d87 |
| TG_(48:0) | +ve | 807.7436, 824.7702, 829.7256, 845.6995 | 6.30 | IS_TG_45:0-d87 |
| TG_(48:1) | +ve | 805.7280, 822.7545, 827.7099, 843.6838 | 6.10 | IS_TG_45:0-d87 |
| TG_(48:2) | +ve | 803.7123, 820.7340, 825.6900, 841.6682 | 5.89 | IS_TG_45:0-d87 |
| TG_(48:3) | +ve | 801.6967, 818.7232, 823.6786, 839.6225 | 5.72 | IS_TG_45:0-d87 |
| TG_(49:0) | +ve | 821.7593, 838.7858, 843.7412, 859.7151 | 6.36 | IS_TG_45:0-d87 |
| TG_(49:1) | +ve | 819.7436, 836.7702, 841.7256, 857.6995 | 6.18 | IS_TG_45:0-d87 |
| TG_(49:2) | +ve | 817.7280, 834.7545, 839.7099, 855.6838 | 6.01 | IS_TG_45:0-d87 |
| TG_(49:3) | +ve | 815.7123, 832.7389, 837.6943, 853.6682 | 5.83 | IS_TG_45:0-d87 |
| TG_(50:0) | +ve | 835.7749, 852.8015, 857.7569, 873.7308 | 6.49 | IS_TG_45:0-d87 |
| TG_(50:1) | +ve | 833.7593, 850.7858, 855.7412, 871.7151 | 6.30 | IS_TG_45:0-d87 |
| TG_(50:2) | +ve | 831.7436, 848.7702, 853.7256, 869.6995 | 6.10 | IS_TG_45:0-d87 |
| TG_(50:3) | +ve | 829.7280, 846.7545, 851.7099, 867.6838 | 5.93 | IS_TG_45:0-d87 |
| TG_(51:0) | +ve | 849.7906, 866.8171, 871.7725, 887.7464 | 6.59 | IS_TG_45:0-d87 |
| TG_(51:1) | +ve | 847.7749, 864.8015, 869.7569, 885.7308 | 6.39 | IS_TG_45:0-d87 |
| TG_(51:2) | +ve | 845.7593, 862.7858, 867.7412, 883.7151 | 6.20 | IS_TG_45:0-d87 |
| TG_(51:3) | +ve | 843.7436, 860.7702, 865.7256, 881.6995 | 6.03 | IS_TG_45:0-d87 |
| TG_(51:4) | +ve | 841.7280, 858.7545, 863.7099, 879.6838 | 5.89 | IS_TG_45:0-d87 |
| TG_(52:0) | +ve | 863.8062, 880.8328, 885.7882, 901.7621 | 6.69 | IS_TG_45:0-d87 |
| TG_(52:1) | +ve | 861.7906, 878.8171, 883.7725, 899.7464 | 6.50 | IS_TG_45:0-d87 |
| TG_(52:2) | +ve | 859.7749, 876.8015, 881.7569, 897.7308 | 6.30 | IS_TG_45:0-d87 |
| TG_(52:3) | +ve | 857.7593, 874.7858, 879.7412, 895.7151 | 6.12 | IS_TG_45:0-d87 |
| TG_(52:4) | +ve | 855.7436, 872.7702, 877.7256, 893.6995 | 5.95 | IS_TG_45:0-d87 |
| TG_(53:0) | +ve | 877.8219, 894.8484, 899.8038, 915.7777 | 6.77 | IS_TG_45:0-d87 |
| TG_(53:1) | +ve | 875.8062, 892.8328, 897.7882, 913.7621 | 6.57 | IS_TG_45:0-d87 |
| TG_(53:2) | +ve | 873.7906, 890.8171, 895.7725, 911.7464 | 6.39 | IS_TG_45:0-d87 |
| TG_(53:3) | +ve | 871.7749, 888.8015, 893.7569, 909.7308 | 6.22 | IS_TG_45:0-d87 |
| TG_(53:4) | +ve | 869.7593, 886.7858, 891.7412, 907.7151 | 6.05 | IS_TG_45:0-d87 |
| TG_(54:0) | +ve | 891.8375, 908.8641, 913.8195, 929.7934 | 6.86 | IS_TG_45:0-d87 |
| TG_(54:1) | +ve | 889.8219, 906.8484, 911.8038, 927.7777 | 6.69 | IS_TG_45:0-d87 |
| TG_(54:2) | +ve | 887.8062, 904.8328, 909.7882, 925.7621 | 6.50 | IS_TG_45:0-d87 |
| TG_(54:3) | +ve | 885.7906, 902.8171, 907.7725, 923.7464 | 6.32 | IS_TG_45:0-d87 |
| TG_(54:4) | +ve | 883.7749, 900.8015, 905.7569, 921.7308 | 6.14 | IS_TG_45:0-d87 |
| TG_(54:5) | +ve | 881.7593, 898.7858, 903.7412, 919.7151 | 6.05 | IS_TG_45:0-d87 |
| TG_(54:6) | +ve | 879.7436, 896.7702, 901.7256, 917.6995 | 5.91 | IS_TG_45:0-d87 |
| TG_(55:0) | +ve | 905.8532, 922.8797, 927.8351, 943.8090 | 6.94 | IS_TG_45:0-d87 |
| TG_(55:1) | +ve | 903.8375, 920.8641, 925.8195, 941.7934 | 6.77 | IS_TG_45:0-d87 |
| TG_(55:2) | +ve | 901.8219, 918.8484, 923.8038, 939.7777 | 6.59 | IS_TG_45:0-d87 |
| TG_(55:3) | +ve | 899.8062, 916.8328, 921.7882, 937.7621 | 6.41 | IS_TG_45:0-d87 |
| TG_(55:4) | +ve | 897.7906, 914.8171, 919.7725, 935.7464 | 6.22 | IS_TG_45:0-d87 |

|            |     |                                            |      |                |
|------------|-----|--------------------------------------------|------|----------------|
| TG_(55:5)  | +ve | 895.7749, 912.8015, 917.7569, 933.7308     | 6.14 | IS_TG_45:0-d87 |
| TG_(55:6)  | +ve | 893.7593, 910.7858, 915.7412, 931.7151     | 6.03 | IS_TG_45:0-d87 |
| TG_(56:0)  | +ve | 919.8688, 936.8954, 941.8508, 957.8247     | 7.03 | IS_TG_45:0-d87 |
| TG_(56:1)  | +ve | 917.8532, 934.8797, 939.8351, 955.8090     | 6.86 | IS_TG_45:0-d87 |
| TG_(56:2)  | +ve | 915.8375, 932.8641, 937.8195, 953.7934     | 6.68 | IS_TG_45:0-d87 |
| TG_(56:3)  | +ve | 913.8219, 930.8484, 935.8038, 951.7777     | 6.50 | IS_TG_45:0-d87 |
| TG_(56:6)  | +ve | 907.7749, 924.8015, 929.7569, 945.7308     | 6.07 | IS_TG_45:0-d87 |
| TG_(56:7)  | +ve | 905.7593, 922.7858, 927.7412, 943.7151     | 5.97 | IS_TG_45:0-d87 |
| TG_(56:8)  | +ve | 903.7436, 920.7702, 925.7256, 941.6995     | 5.78 | IS_TG_45:0-d87 |
| TG_(57:0)  | +ve | 933.8845, 950.9110, 955.8664, 971.8403     | 7.09 | IS_TG_45:0-d87 |
| TG_(57:2)  | +ve | 929.8532, 946.8797, 951.8351, 967.8090     | 6.78 | IS_TG_45:0-d87 |
| TG_(57:3)  | +ve | 927.8375, 944.8641, 949.8195, 965.7934     | 6.61 | IS_TG_45:0-d87 |
| TG_(57:4)  | +ve | 925.8219, 942.8484, 947.8038, 963.7777     | 6.42 | IS_TG_45:0-d87 |
| TG_(57:5)  | +ve | 923.8062, 940.8328, 945.7882, 961.7621     | 6.26 | IS_TG_45:0-d87 |
| TG_(57:6)  | +ve | 921.7906, 938.8171, 943.7725, 959.7464     | 6.16 | IS_TG_45:0-d87 |
| TG_(58:7)  | +ve | 933.7906, 950.8171, 955.7725, 971.7464     | 6.18 | IS_TG_45:0-d87 |
| TG_(58:8)  | +ve | 931.7749, 948.8015, 953.7569, 969.7308     | 5.99 | IS_TG_45:0-d87 |
| TG_(58:9)  | +ve | 929.7593, 946.7858, 951.7412, 967.7151     | 5.82 | IS_TG_45:0-d87 |
| TG_(58:10) | +ve | 927.7436, 944.7702, 949.7256, 965.6995     | 5.66 | IS_TG_45:0-d87 |
| TG_(58:12) | +ve | 923.7123, 940.7389, 945.6943, 961.6682     | 5.40 | IS_TG_45:0-d87 |
| TG_(59:3)  | +ve | 955.8688, 972.8954, 977.8508, 993.8247     | 6.78 | IS_TG_45:0-d87 |
| TG_(59:4)  | +ve | 953.8532, 970.8797, 975.8351, 991.8090     | 6.61 | IS_TG_45:0-d87 |
| TG_(59:5)  | +ve | 951.8375, 968.8641, 973.8195, 989.7934     | 6.43 | IS_TG_45:0-d87 |
| TG_(59:6)  | +ve | 949.8219, 966.8484, 971.8038, 987.7777     | 6.36 | IS_TG_45:0-d87 |
| TG_(59:7)  | +ve | 947.8062, 964.8328, 969.7882, 985.7621     | 6.26 | IS_TG_45:0-d87 |
| TG_(59:8)  | +ve | 945.7906, 962.8171, 967.7725, 983.7464     | 6.10 | IS_TG_45:0-d87 |
| TG_(59:9)  | +ve | 943.7749, 960.8015, 965.7569, 981.7308     | 5.93 | IS_TG_45:0-d87 |
| TG_(60:10) | +ve | 955.7749, 972.8015, 977.7569, 993.7308     | 5.83 | IS_TG_45:0-d87 |
| TG_(60:12) | +ve | 951.7436, 968.7702, 973.7256, 989.6995     | 5.63 | IS_TG_45:0-d87 |
| TG_(61:12) | +ve | 965.7593, 982.7858, 987.7412, 1003.7151    | 5.66 | IS_TG_45:0-d87 |
| TG_(62:12) | +ve | 979.7749, 996.8015, 1001.7569, 1017.7308   | 5.78 | IS_TG_45:0-d87 |
| TG_(62:13) | +ve | 977.7593, 994.7858, 999.7412, 1015.7151    | 5.64 | IS_TG_45:0-d87 |
| TG_(62:14) | +ve | 975.7436, 992.7702, 997.7256, 1013.6995    | 5.43 | IS_TG_45:0-d87 |
| TG_(66:18) | +ve | 1023.7436, 1040.7702, 1045.7256, 1061.6995 | 5.34 | IS_TG_45:0-d87 |

31

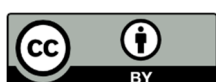

© 2020 by the authors. Submitted for possible open access publication under the terms and conditions of the Creative Commons Attribution (CC BY) license (<http://creativecommons.org/licenses/by/4.0/>).

32
